# Supplementary material
Source: Elsevier journal article supplement (https://www.sciencedirect.com/science/article/pii/S2530064417301049)
Supplement: mmc1 [file S2530064417301049:mmc1.docx]

**Perspectives in Ecology and Conservation**

**Habitat fragmentation narrows the distribution of avian functional traits associated with seed dispersal in tropical forest**

Alex A. A. Bovoa,b,*, Katia M. P. M. B. Ferraza, Marcelo Magiolia, Eduardo R. Alexandrinoa, Érica Hasuic, Milton C. Ribeirod, Joseph A. Tobiasb,e

a Wildlife Ecology, Management and Conservation Lab (LEMaC), Forest Science Department, ESALQ, University of São Paulo, Av. Pádua Dias, 11 - Caixa Postal 09, 13418-900, Piracicaba, SP, Brazil. E-mails: alex_bovo@hotmail.com, katia.ferraz@usp.br, marcelo.magioli@gmail.com, eduardoalexandrino@hotmail.com

b Edward Grey Institute, Department of Zoology, University of Oxford, Oxford, OX1 3PS, United Kingdom

c Institute of Natural Sciences, Federal University of Alfenas (UNIFAL-MG), 37130-000, Alfenas, MG, Brazil. E-mail: ericahasui@gmail.com

d Bioscience Institute, UNESP – Univ. Estadual Paulista, Department of Ecology, Spatial Ecology and Conservation Lab (LEEC), 13506-900, Rio Claro, SP, Brazil. E-mail: miltinho.astronauta@gmail.com

e Department of Life Sciences, Imperial College London, Silwood Park, Buckhurst Road, Ascot, Berkshire, SL5 7PY, United Kingdom. E-mail: j.tobias@imperial.ac.uk

*Corresponding author: alex_bovo@hotmail.com

Supplementary data 1 – Studies included in the frugivorous bird assemblages at the southeastern portion of the Brazilian Atlantic Forest. * indicate areas inside the Serra do Mar continuum and which values was standardized to 500,000 ha.

| **Study** | **Identification** | **Size (ha)** | **Latitude** | **Longitude** | **FRic** |
| --- | --- | --- | --- | --- | --- |
| 1 | 1A - Intervales State Park* | 41705 | -24.3491 | -48.4230 | 0.8342 |
| 2 | 2A - Santa Genebra Forest | 251 | -22.8244 | -47.1101 | 0.1857 |
| 3 | 3A - Godoy Forest | 656 | -23.4521 | -51.2543 | 0.6871 |
| 3 | 3B - Fragment A | 56 | -23.4734 | -51.2412 | 0.6053 |
| 3 | 3C - Fragment B | 25 | -23.4689 | -51.2544 | 0.4738 |
| 3 | 3D - Fragment C | 11 | -23.4756 | -51.2573 | 0.4993 |
| 3 | 3E - Ibiporã Garden | 60 | -23.2563 | -51.0318 | 0.3794 |
| 4 | 4A - Barreiro Rico Farm | 1451 | -22.6693 | -48.1518 | 0.4510 |
| 5 | 5A - Carlos Botelho State Park* | 37644 | -24.1635 | -48.0066 | 0.7978 |
| 6 | 6A - Caetetus Ecological Station | 2180 | -22.4064 | -49.7033 | 0.5876 |
| 7 | 7A - Boracéia Biological Station* | 96 | -23.6535 | -45.8902 | 0.6565 |
| 8 | 8A - Morro Grande Reserve* | 10870 | -23.7513 | -46.9704 | 0.5450 |
| 9 | 9A - Neblinas Park* | 2800 | -23.7765 | -46.2024 | 0.7759 |
| 10 | 10A - EPDA - Peti | 605 | -19.8927 | -43.3751 | 0.6305 |
| 11 | 11A - Poço D'Anta Biological Reserve | 277 | -21.7469 | -43.3201 | 0.5941 |
| 12 | 12A - São Carlos Ecological Station | 75 | -22.0812 | -48.0281 | 0.2142 |
| 12 | 12B - Santa Cecília Farm Reserve | 100 | -20.7667 | -47.2386 | 0.2863 |
| 13 | 13A - Manoel Júlio de Almeida Forest | 9.7 | -23.1992 | -50.6343 | 0.2075 |
| 14 | 14A - Mata São Franciso State Park | 832 | -23.1611 | -50.5657 | 0.3712 |
| 15 | 15A - Entre Rios Farm | 319 | -23.2590 | -48.4358 | 0.2800 |
| 15 | 15B - Montes Claros Farm | 1150 | -23.0351 | -46.0228 | 0.3669 |
| 16 | 16A - Três Barras National Forest | 4458 | -26.2205 | -50.2874 | 0.5997 |
| 17 | 17A - Rio do Peixe Natural Park | 300 | -27.1668 | -51.5747 | 0.3735 |
| 18 | 18A - Mata Samuel de Paula RPPN | 148 | -20.0012 | -43.8722 | 0.3031 |
| 19 | 19A - Ronda Natural Park | 1200 | -29.4704 | -50.5427 | 0.5043 |
| 20 | 20A - Poço das Antas Biological Reserve | 5052 | -22.5357 | -42.2837 | 0.3983 |
| 21 | 21A - Fragment | 5 | -22.4799 | -47.5936 | 0.1136 |
| 22 | 22A - Salto Morato Natural Reserve* | 2340 | -25.1653 | -48.2993 | 0.7982 |
| 23 | 23A - São Pedro do Ivaí Fragment | 600 | -23.8048 | -51.9329 | 0.4418 |
| 24/25 | 24A - Iguaçu National Park | 185000 | -25.3036 | -53.7593 | 0.8865 |
| 26 | 26A - UNISC RPPN | 221 | -29.3966 | -52.5424 | 0.6195 |
| 27 | 27A - Ninho do Corvo RPPN | 21.6 | -25.0670 | -51.1086 | 0.3353 |
| 28 | 28A - Irati National Forest | 18 | -25.3815 | -50.5835 | 0.4493 |
| 29 | 29A - Vermelho Fragment | 46.92 | -23.5315 | -45.6877 | 0.1363 |
| 29 | 29B - Amarelo Fragment | 26.38 | -23.5351 | -45.6760 | 0.0554 |
| 30 | 30A - Fragment A | 840 | -25.2897 | -49.8026 | 0.5274 |
| 30 | 30B - Fragment B | 40 | -25.2992 | -49.8326 | 0.5261 |
| 30 | 30C - Fragment C | 20 | -25.3151 | -49.8267 | 0.4688 |
| 30 | 30D - Fragment G | 9 | -25.3285 | -49.8258 | 0.1610 |
| 31/32 | 31A - Fragment 1 | 22.98 | -22.2169 | -47.5983 | 0.1134 |
| 31/32 | 31B - Fragment 2 | 2.59 | -22.2166 | -47.6065 | 0.1067 |
| 31/32 | 31C - Fragment 3 | 34.96 | -22.2967 | -47.6090 | 0.1848 |
| 31/32 | 31D - Fragment 4 | 61.74 | -22.3454 | -47.5811 | 0.1111 |
| 31/32 | 31E - Fragment 5 | 57.3 | -22.4814 | -47.7048 | 0.1829 |
| 31/32 | 31F - Fragment 6 | 31.66 | -22.5090 | -47.6956 | 0.1147 |
| 31/32 | 31G - Fragment 7 | 14.75 | -22.5691 | -47.6841 | 0.1097 |
| 31/32 | 31H - Fragment 8 | 113.85 | -22.5755 | -47.6728 | 0.1831 |
| 33 | 33A - Pedreira Forest | 14 | -22.7043 | -47.6298 | 0.0894 |

References

1. Aleixo, A., Galetti, M., 1997. The conservation of the avifauna in a lowland Atlantic forest in south-east Brazil. Bird Conservation International, 7(03), 235-261.
2. Aleixo, A., Vielliard, J.M., 1995. Composição e dinâmica da avifauna da mata de Santa Genebra, Campinas, São Paulo, Brasil. Revista Brasileira de Zoologia, 12(3), 493-511.
3. Anjos, L., 2001. Bird communities in five Atlantic forest fragments in southern Brazil. Ornitologia Neotropical, 12, 11-27.
4. Antunes, A.Z., 2005. Alterações na composição da comunidade de aves ao longo do tempo em um fragmento florestal no sudeste do Brasil. Ararajuba, 13(1), 47-61.
5. Antunes, A.Z., Silva, B.G.D., Matsukuma, C.K., Eston, M.R.D., Santos, A.M.R.D., 2013. Aves do Parque Estadual Carlos Botelho–SP. Biota Neotropica, 13(2), 124-140.
6. Cavarzere, V., Moraes, G.P., Donatelli, R.J., 2009. Avifauna da Estação Ecológica dos Caetetus, interior de São Paulo, Brasil. Papéis Avulsos de Zoologia (São Paulo), 49(35), 477-485.
7. Cavarzere, V., Moraes, G.P., Silveira, L.F., 2010. Boracéia Biological Station: an ornithological review. Papéis Avulsos de Zoologia (São Paulo), 50(13), 189-201.
8. Develey, P.F., Martensen, A.C., 2006. Birds of Morro Grande Reserve (Cotia, SP). Biota Neotropica, 6(2), 0-0.
9. Donatelli, R.J., Ferreira, C.D., Costa, T.V.V., 2011. Avian communities in woodlots in Parque das Neblinas, Bertioga, São Paulo, Brazil. Revista Brasileira de Biociências, 9(2).
10. Faria, C.M., Rodrigues, M., Amaral, F.Q., Módena, É., Fernandes, A.M., 2006. Aves de um fragmento de Mata Atlântica no alto Rio Doce, Minas Gerais: colonização e extinção. Revista Brasileira de Zoologia, 23(4), 1217-1230.
11. Manhães, M.A., Loures-Ribeiro, A., 2011. Avifauna da Reserva Biológica Municipal Poço D’Anta, Juiz de Fora, MG. Biota Neotropica, 11(3), 275-286.
12. Pozza, D.D., Pires, J.S.R., 2003. Bird communities in two fragments of semideciduos forest in rural São Paulo state. Brazilian Journal of Biology, 63(2), 307-319.
13. Bornschein, M.R., Reinert, B.L., 2000. Aves de três remanescentes florestais do norte do estado do Paraná, sul do Brasil, com sugestões para a conservação e manejo. Revista Brasileira de Zoologia, 17(3), 615-636.
14. Oliveira, R.C., 2011. Relatório do Levantamento da avifauna do PE Mata São Francisco – PR. Londrina.
15. Cavarzere, V., Alves, F., Machado, É., Rego, M.A., Silveira, L.F., Costa, M.M., Calonge-Méndez, A., 2013. Evaluation of methodological protocols using point counts and mist nets: a case study in southeastern Brazil. Papéis Avulsos de Zoologia (São Paulo), 53(26), 345-357.
16. Corrêa, L., Bazílio, S., Woldan, D., Boesing, A.L., 2008. Avifauna da Floresta Nacional de Três Barras (Santa Catarina, Brasil). Atualidades Ornitológicas, 143, 38-41.
17. Favretto, M.A., Zago, T., Guzzi, A., 2008. Avifauna do Parque Natural Municipal Rio do Peixe, Santa Catarina, Brasil. Atualidades Ornitológicas, 141, 87-93.
18. Ferreira, J.D., Costa, L.M., Rodrigues, M., 2009. Aves de um remanescente florestal do Quadrilátero Ferrífero, Minas Gerais. Biota Neotropica, 9(3), 39-54.
19. Franz, I., Barros, M.P.D., Cappelatti, L., Dala-Corte, R.B., Ott, P.H., 2014. Birds of two protected areas in the southern range of the Brazilian Araucaria forest. Papéis Avulsos de Zoologia (São Paulo), 54(10), 111-127.
20. Pacheco, J.F., Nascimento, I., 2010. Avifauna da Reserva Biológica de Poço das Antas, Silva Jardim, RJ. Biológica, 9(771981), 887003.
21. Athiê, S., 2009. Composição da avifauna e frugivoria por aves em um mosaico de vegetação secundária em Rio Claro, SP. Dissertação do programa Mestre em Ecologia e Recursos Naturais. UFSCar.
22. Straube, F.C., Urben-Filho, A., 2005a. Avifauna da Reserva Natural Salto Morato (Guaraqueçaba, Paraná). Atualidades Ornitológicas, 124, 12.
23. Straube, F.C., Urben-Filho, A., 2005b. Observações sobre a avifauna de pequenos remanescentes florestais na região noroeste do Paraná (Brasil). Atualidades Ornitológicas, 123, 10.
24. Straube, F.C., Urben-Filho, A., 2004. Uma revisão crítica sobre o grau de conhecimento da avifauna do Parque Nacional do Iguaçu (Paraná, Brasil) e áreas adjacentes. Atualidades Ornitológicas, 118, 6.
25. Straube, F.C., Urben-Filho, A., Cândido Jr, J.F., 2004. Novas informações sobre a avifauna do Parque Nacional do Iguaçu (Paraná). Atualidades Ornitológicas, 120, 10.
26. Oliveira, S.L., Köhler, A., 2010. Avifauna da RPPN da UNISC, Sinimbu, Rio Grande do Sul, Brasil. Biotemas, 23(3), 93-103.
27. Vogel, H.F., Zawadzki, C.H., Metri, R., Valle, L.G., Filho, A.B.S., 2010. Avifauna da RPPN Ninho do Corvo, um fragmento de floresta ombrófila mista na região centro sul do estado do Paraná, Brasil.
28. Volpato, G.H., Prado, V.M., Anjos, L., 2010. What can tree plantations do for forest birds in fragmented forest landscapes? A case study in southern Brazil. Forest Ecology and Management, 260(7), 1156-1163.
29. Dário, F.R., 1999. Influência de corredor florestal entre fragmentos da Mata Atlântica utilizando-se a avifauna como indicador ecológico.
30. Anjos, L., Boçon, R., 1999. Bird communities in natural forest patches in southern Brazil. The Wilson Bulletin, 397-414.
31. Alexandrino, E.R., Buechley, E.R., Piratelli, A.J., Ferraz, K.M.P.M.B., Moral, R.A., Sekercioglu, C.H., Silva, W.R., Couto, H.T.Z., 2016. Bird sensitivity to disturbance as an indicator of forest patch conditions: An issue in environmental assessments. Ecological Indicators, 66, 369-381.
32. Luz. D.T.A., 2013. Ecologia trófica em matrizes agrícolas: uso da ferramenta isotópica para conservação de aves em ambientes antrópicos. Dissertação (Mestrado em Recursos Florestais) – Escola Superior de Agricultura “Luiz de Queiroz”, Universidade de São Paulo, Piracicaba.
33. Luz, D.T.A., 2010. Interações frugívoros-plantas: diagnóstico em um fragmento degradado. Piracicaba.
