# Supplementary material
Source: Elsevier journal article supplement (https://www.sciencedirect.com/science/article/pii/S2530064417301049)
Supplement: mmc2 [file S2530064417301049:mmc2.xlsx]

## Sheet: Table S1
Perspectives in Ecology and Conservation
Habitat fragmentation narrows the distribution of avian functional traits associated with seed dispersal in tropical forest
Alex A. A. Bovoa,b,*, Katia M. P. M. B. Ferraza, Marcelo Magiolia, Eduardo R. Alexandrinoa, Érica Hasuic, Milton C. Ribeirod, Joseph A. Tobiasb,e
a Wildlife Ecology, Management and Conservation Lab (LEMaC), Forest Science Department, ESALQ, University of São Paulo, Av. Pádua Dias, 11 - Caixa Postal 09, 13418-900, Piracicaba, SP, Brazil. E-mails: alex_bovo@hotmail.com, katia.ferraz@usp.br, marcelo.magioli@gmail.com, eduardoalexandrino@hotmail.com
b Edward Grey Institute, Department of Zoology, University of Oxford, Oxford, OX1 3PS, United Kingdom
c Institute of Natural Sciences, Federal University of Alfenas (UNIFAL-MG), 37130-000, Alfenas, MG, Brazil. E-mail: ericahasui@gmail.com
d Bioscience Institute, UNESP – Univ. Estadual Paulista, Department of Ecology, Spatial Ecology and Conservation Lab (LEEC), 13506-900, Rio Claro, SP, Brazil. E-mail: miltinho.astronauta@gmail.com
e Department of Life Sciences, Imperial College London, Silwood Park, Buckhurst Road, Ascot, Berkshire, SL5 7PY, United Kingdom. E-mail: j.tobias@imperial.ac.uk
*Corresponding author: alex_bovo@hotmail.com
Table S1 - Species traits values and composition of each frugivorous bird assembles at the southeastern portion of the Brazilian Atlantic Forest. Identification from 1A to 33A represents the forest fragments; the numbers in parenthesis represent the cited literature.
Species name	Gape width	First-secondary length	Wing length	Hand-wing index	Body mass	Forest fragments ID (Reference)
						1A (1)	2A (2)	3A (3)	3B (3)	3C (3)	3D (3)	3E (3)	4A (4)	5A (5)	6A (6)	7A (7)	8A (8)	9A (9)	10A (10)	11A (11)	12A (12)	12B (12)	13A (13)	14A (14)	15A (15)	15B (15)	16A (16)	17A (17)	18A (18)	19A (19)	20A (20)	21A (21)	22A (22)	23A (23)	24A (24/25)	26A (26)	27A (27)	28A (28)	29A (29)	29B (29)	30A (30)	30B (30)	30C (30)	30D (30)	31A (31/32)	31B (31/32)	31C (31/32)	31D (31/32)	31E (31/32)
Penelope superciliaris	21.24	245.29	245.29	0	894.99	0	1	1	1	1	1	1	1	0	1	0	0	0	1	0	0	0	1	1	1	0	0	0	0	0	1	0	0	1	1	0	0	0	1	0	0	0	0	0	0	0	1	0	1
Penelope obscura	19.37	274.6	297.33	7.66	1770	1	0	0	0	0	0	0	0	1	0	1	1	1	1	1	0	0	1	0	0	1	1	1	1	0	0	0	1	0	1	1	1	1	0	0	1	1	1	1	0	0	0	0	0
Aburria jacutinga	21.08	274.63	341.25	19.57	1240.96	1	0	1	0	0	0	0	0	1	0	1	0	0	0	0	0	0	0	0	0	0	0	0	0	0	0	0	1	0	1	0	0	0	0	0	0	0	0	0	0	0	0	0	0
Ortalis guttata	13.63	165.75	195	15	547.72	0	0	0	0	0	0	0	0	0	0	0	0	0	0	0	0	0	0	0	0	0	0	0	0	1	0	0	1	0	0	1	0	0	0	0	0	0	0	0	0	0	0	0	0
Crax fasciolata	23.3	348.28	364.5	4.57	2600	0	0	1	0	0	0	0	0	0	0	0	0	0	0	0	0	0	0	0	0	0	0	0	0	0	0	0	0	0	0	0	0	0	0	0	0	0	0	0	0	0	0	0	0
Crax blumenbachii	25.95	345.2	395	12.61	3500	0	0	0	0	0	0	0	0	0	0	0	0	0	1	0	0	0	0	0	0	0	0	0	0	0	0	0	0	0	0	0	0	0	0	0	0	0	0	0	0	0	0	0	0
Odontophorus capueira	12.25	130.05	145.25	10.46	425.4	1	0	0	1	1	1	0	1	1	1	1	1	1	0	0	0	0	0	0	0	0	1	0	0	1	0	0	1	0	1	1	0	1	0	0	1	1	1	0	0	0	0	0	0
Elanoides forficatus	22.96	232.19	403.75	42.45	416.24	1	0	0	0	0	0	0	0	1	0	0	0	1	0	1	0	0	0	0	0	0	1	0	0	1	0	0	1	0	1	1	0	0	0	0	0	0	0	0	0	0	0	0	0
Urubitinga urubitinga	30.53	355.48	410.5	13.31	1152.87	1	0	0	0	0	0	0	0	0	0	0	0	0	0	0	0	0	0	0	0	0	0	0	0	0	0	0	0	0	1	0	0	0	0	0	0	0	0	0	0	0	0	0	0
Amaurolimnas concolor	9.15	96.05	131.5	27.08	133	1	0	0	0	0	0	0	0	1	0	0	0	0	0	0	0	0	0	0	0	0	0	0	0	0	0	0	0	0	0	0	0	0	0	0	0	0	0	0	0	0	0	0	0
Patagioenas speciosa	7.58	113.98	179.5	36.51	258.47	0	0	0	1	0	0	1	0	0	0	0	0	0	0	0	0	0	0	0	0	0	0	0	0	0	1	0	0	0	0	0	0	0	0	0	0	1	0	0	0	0	0	0	0
Patagioenas cayennensis	8.93	111.7	173.25	35.53	229	1	1	1	1	1	1	1	1	1	1	1	1	0	0	1	1	1	1	1	0	1	1	0	0	1	1	1	0	1	1	1	0	0	0	0	1	1	1	1	1	1	1	1	1
Patagioenas plumbea	6.8	116.28	179.75	35.33	178.77	1	0	1	1	0	0	0	0	1	0	1	1	1	1	0	0	0	0	0	0	1	0	0	1	0	0	0	1	0	0	0	0	0	0	0	1	1	0	0	0	0	0	0	0
Leptotila verreauxi	8.48	102.78	135.75	24.31	146.88	1	1	1	1	1	1	1	1	1	1	0	1	1	1	1	1	1	1	1	1	1	1	0	1	1	1	1	1	1	1	1	1	0	1	1	1	1	1	1	1	1	1	1	1
Leptotila rufaxilla	8.7	98.32	137.33	28.36	157	1	1	1	1	1	1	1	0	1	1	1	1	1	1	1	1	1	0	1	1	1	1	1	1	1	1	1	1	1	1	1	0	1	0	0	1	1	1	1	1	0	1	0	1
Geotrygon violacea	7.47	95.35	145	34.27	95.2	0	1	0	0	0	0	0	0	0	1	0	0	0	0	0	0	0	0	0	1	0	0	0	0	0	0	0	0	0	1	0	0	0	0	0	0	0	0	0	0	0	0	0	0
Geotrygon montana	9.34	96.04	135.42	28.88	133.86	1	0	1	1	1	1	1	1	1	1	1	1	1	1	1	0	0	0	0	1	1	0	0	0	1	1	0	1	0	1	0	0	0	1	0	1	1	0	0	0	0	0	0	0
Coccyzus americanus	13.36	82.63	145	43	64	0	0	0	0	0	0	0	0	0	0	1	0	0	0	0	0	0	0	0	0	0	0	0	0	0	0	0	0	0	0	0	0	0	0	0	1	1	0	0	0	0	0	0	0
Crotophaga major	19.6	148.51	194.13	23.37	148.25	0	0	0	0	0	0	0	0	1	0	0	0	0	0	0	0	0	0	0	0	0	0	0	0	0	1	0	0	0	1	0	0	0	0	0	0	0	0	0	0	0	0	0	0
Trogon viridis	21.98	96.6	144.63	33.19	89.69	1	0	1	1	1	1	0	0	1	0	1	0	0	0	1	0	0	0	0	0	0	0	0	0	0	0	0	1	0	1	0	0	0	0	0	0	0	0	0	0	0	0	0	0
Trogon surrucura	19.5	83.68	137.5	39.15	73.29	1	0	1	1	1	1	1	1	1	1	1	1	1	1	1	1	1	0	1	1	0	1	1	1	1	0	0	1	1	1	1	1	1	0	0	1	1	1	0	0	0	0	0	0
Trogon rufus	18.7	70.27	109.75	35.94	53.8	1	0	1	0	0	0	0	1	1	1	1	1	1	0	0	0	0	0	0	0	0	1	0	0	0	0	0	1	0	1	1	0	1	0	0	1	1	0	0	0	0	0	0	0
Baryphthengus ruficapillus	22.5	117.78	140.25	16	141.65	1	0	1	1	1	1	0	1	1	1	1	0	0	0	1	1	0	0	1	0	1	0	0	0	0	1	0	1	1	1	0	0	1	0	0	0	0	0	0	0	0	0	0	0
Ramphastos vitellinus	31.25	165.98	189.75	11.82	360.36	1	0	0	0	0	0	0	0	1	0	0	0	1	0	0	0	0	0	0	0	0	0	0	0	0	1	0	1	0	1	0	0	0	0	0	0	0	0	0	0	0	0	0	0
Ramphastos dicolorus	31.03	164.88	191.75	14.01	331	1	0	1	1	1	1	0	0	1	1	1	1	1	0	0	0	0	0	0	0	0	1	1	0	1	0	0	1	1	1	1	1	1	0	0	1	1	1	0	0	0	0	0	0
Selenidera maculirostris	23.3	111.15	130.5	14.79	164	1	0	1	1	1	1	1	0	1	0	1	0	0	0	0	0	0	0	1	0	0	0	0	0	0	0	0	1	1	1	0	0	0	0	0	0	0	0	0	0	0	0	0	0
Pteroglossus bailloni	23.93	110.4	129.25	14.52	146	1	0	1	0	0	0	0	0	1	0	1	0	0	0	0	0	0	0	1	0	1	0	0	0	0	0	0	1	1	1	0	1	1	0	0	0	0	0	0	0	0	0	0	0
Pteroglossus aracari	29.88	122.44	143.25	14.46	250.16	1	0	1	0	1	0	0	0	0	1	0	0	0	0	1	0	1	0	0	0	0	0	0	0	0	1	0	0	1	0	0	0	0	0	0	0	0	0	0	0	0	0	0	0
Pteroglossus castanotis	30.13	126.2	150.5	16.22	258.09	0	0	0	0	0	0	0	0	0	1	0	0	0	0	0	0	0	0	0	0	0	0	0	0	0	0	0	0	0	1	0	0	0	0	0	0	0	0	0	0	0	0	0	0
Melanerpes flavifrons	9.23	85.78	117	26.64	57.78	1	0	1	1	1	1	1	0	1	1	1	0	0	0	0	0	0	0	1	0	0	1	0	0	0	0	0	1	1	1	0	0	1	0	0	1	1	0	0	0	0	0	0	0
Veniliornis maculifrons	11.06	72.6	94	22.75	38.69	0	0	0	0	0	0	0	0	0	0	0	0	0	0	1	0	0	0	0	0	0	0	0	0	0	1	0	0	0	0	0	0	0	0	0	0	0	0	0	0	0	0	0	0
Veniliornis spilogaster	11.25	77.35	95.25	18.77	40.3	1	1	1	1	1	1	1	1	1	1	1	1	1	0	1	0	1	1	1	1	1	1	1	0	1	0	0	1	1	1	1	1	1	1	0	1	1	1	1	0	0	0	0	1
Colaptes melanochloros	12.92	115.49	133.38	13.49	127.27	1	1	1	1	1	1	1	1	1	1	1	0	0	1	1	0	0	0	1	0	1	1	1	0	1	0	1	1	1	1	1	1	1	1	0	1	1	1	0	1	1	1	1	1
Celeus flavescens	14.3	127.9	152.75	16.25	139	1	1	1	1	1	1	1	1	1	1	1	1	1	1	0	0	0	0	1	1	1	0	0	0	1	1	0	1	1	1	1	0	0	0	0	0	0	0	0	0	0	0	0	0
Dryocopus lineatus	16.49	148.54	184	19.22	183.19	1	1	1	1	0	1	1	1	1	1	1	1	1	1	1	1	1	1	1	1	1	1	1	0	0	0	1	1	1	1	0	0	1	0	0	1	0	0	0	1	0	1	0	1
Campephilus melanoleucos	17.82	144.95	182.13	22.53	256	0	0	1	0	0	0	0	0	0	0	0	0	0	0	0	0	0	0	0	0	0	0	0	0	0	0	0	0	0	0	0	0	0	0	0	0	0	0	0	0	0	0	0	0
Dysithamnus stictothorax	9.3	56.53	61.5	8.09	16.16	1	0	0	0	0	0	0	0	1	0	0	1	0	0	1	0	0	0	0	0	0	0	0	0	0	0	0	1	0	1	0	0	0	0	0	0	0	0	0	0	0	0	0	0
Dysithamnus mentalis	7.71	53.77	59.91	10.24	14.87	1	0	1	1	1	1	1	1	1	1	1	1	1	1	1	1	1	1	1	1	1	1	1	1	1	0	0	1	1	1	1	0	1	1	1	1	1	1	1	1	0	1	1	1
Dysithamnus xanthopterus	9	55.15	62.75	12.1	16.16	1	0	0	0	0	0	0	0	1	0	1	0	0	0	0	0	0	0	0	0	0	0	0	0	0	0	0	0	0	0	0	0	0	0	0	0	0	0	0	0	0	0	0	0
Herpsilochmus rufimarginatus	7.8	47.14	50.5	6.67	10.58	1	0	1	1	0	1	1	1	1	1	0	1	1	1	1	0	0	1	1	0	0	0	0	0	0	1	0	1	0	1	0	0	0	0	0	0	0	0	0	0	0	0	0	0
Thamnophilus caerulescens	9.91	62.68	69	9.14	21.1	1	1	1	1	1	1	1	1	1	1	1	1	1	1	1	1	1	1	1	1	1	1	1	1	1	0	1	1	1	1	1	1	1	1	1	1	1	1	1	1	0	1	1	1
Chamaeza campanisona	12.37	86.16	97.6	11.67	90.58	1	0	1	1	0	0	0	1	1	1	1	1	1	0	0	0	0	0	1	0	0	1	1	0	1	0	0	1	1	1	1	0	1	0	0	1	1	0	0	0	0	0	0	0
Neopelma pallescens	8.93	62.88	76.25	17.54	18.2	0	0	0	0	0	0	0	0	0	0	0	0	0	1	0	0	0	0	0	0	0	0	0	1	0	0	0	0	0	0	0	0	0	0	0	0	0	0	0	0	0	0	0	0
Neopelma chrysolophum	8.04	52.83	68	22.36	16.02	0	0	0	0	0	0	0	0	1	0	1	1	1	0	0	0	0	0	0	0	0	0	0	0	0	0	0	0	0	0	0	0	0	0	0	0	0	0	0	0	0	0	0	0
Pipra fasciicauda	9.5	52.24	64.1	18.48	15.9	0	0	1	0	0	0	0	0	0	0	0	0	0	0	0	0	0	0	0	0	0	0	0	0	0	0	0	0	1	1	0	0	0	0	0	0	0	0	0	0	0	0	0	0
Ceratopipra rubrocapilla	9.96	47.01	58.5	19.64	12	0	0	0	0	0	0	0	0	0	0	0	0	0	0	0	0	0	0	0	0	0	0	0	0	0	1	0	0	0	0	0	0	0	0	0	0	0	0	0	0	0	0	0	0
Manacus manacus	10.25	43.83	52	15.7	16.7	1	1	1	0	0	0	0	1	1	0	0	0	1	1	1	0	0	0	0	0	1	0	0	0	0	1	0	1	0	1	0	0	0	0	0	0	0	0	0	1	0	0	0	1
Machaeropterus regulus	7.25	40.13	53	24.29	9.34	0	0	0	0	0	0	0	0	0	0	0	0	0	0	0	0	0	0	0	0	0	0	0	0	0	1	0	0	0	0	0	0	0	0	0	0	0	0	0	0	0	0	0	0
Dixiphia pipra	9.67	47.93	59.5	19.43	11.11	0	0	0	0	0	0	0	0	0	0	0	0	0	0	0	0	0	0	0	0	0	0	0	0	0	1	0	0	0	0	0	0	0	0	0	0	0	0	0	0	0	0	0	0
Ilicura militaris	7.73	46.93	60.75	22.63	12.7	1	0	0	0	0	0	0	0	1	0	1	0	1	1	1	0	0	0	0	0	1	0	0	1	0	0	0	1	0	0	0	0	0	1	1	0	0	0	0	0	0	0	0	0
Chiroxiphia caudata	9.3	64.6	76.75	15.81	25.6	1	1	1	1	1	0	0	1	1	1	1	1	1	1	1	1	1	0	1	1	1	1	1	1	1	1	0	1	0	1	1	1	1	1	1	1	1	1	0	1	0	0	1	1
Antilophia galeata	10.83	67.75	77.25	12.24	21.48	0	0	0	0	0	0	0	1	0	1	0	0	0	0	0	0	1	0	0	0	0	0	0	0	0	0	0	0	0	0	0	0	0	0	0	0	0	0	0	1	0	1	0	1
Oxyruncus cristatus	11.78	51.5	111.08	50.96	42	1	0	1	1	0	0	0	1	1	1	1	0	1	0	0	0	0	0	0	0	0	0	0	0	0	0	0	1	0	1	0	0	0	0	0	0	0	0	0	0	0	0	0	0
Schiffornis virescens	9.83	67.05	79.5	15.67	25.6	1	0	1	0	0	0	1	1	1	1	1	1	1	1	1	0	0	0	0	1	1	1	1	1	1	0	0	1	0	1	1	0	1	0	0	1	1	0	0	0	0	0	0	0
Schiffornis turdina	13.85	75.63	89	15.02	31.7	0	0	0	0	0	0	0	0	0	0	0	0	0	0	0	0	0	0	0	0	0	0	0	0	0	1	0	0	0	0	0	0	0	0	0	0	0	0	0	0	0	0	0	0
Laniisoma elegans	14.73	76.58	103.5	25.99	47.4	1	0	0	0	0	0	0	1	0	0	1	1	0	0	0	0	0	0	0	0	0	0	0	0	0	1	0	0	0	0	0	0	0	0	0	0	0	0	0	0	0	0	0	0
Tityra inquisitor	15.75	82.94	105.5	21.35	43.1	1	0	1	0	1	0	1	1	1	1	0	0	1	0	0	0	0	0	0	0	0	1	0	0	0	0	0	1	1	1	0	1	1	0	0	0	0	0	0	0	0	0	0	0
Tityra cayana	19.36	87.07	110.75	21.42	68.1	1	0	1	1	1	1	0	1	1	1	1	1	0	0	0	0	0	0	1	0	0	0	0	0	1	0	0	1	1	1	1	0	1	0	0	1	1	0	0	0	0	0	0	0
Pachyramphus rufus	10.91	57.99	66	12.13	18.8	0	1	0	0	0	0	0	0	0	0	0	0	0	0	0	0	0	0	0	0	0	0	0	0	0	0	0	0	0	0	0	0	0	0	0	1	1	1	0	0	0	0	0	0
Pachyramphus castaneus	9.65	61.36	71.75	14.3	19.5	1	0	1	1	1	1	1	1	1	0	1	1	1	0	1	0	0	0	0	0	1	1	0	0	1	0	0	1	1	1	1	0	1	0	0	1	1	0	0	0	0	0	0	0
Pachyramphus polychopterus	10.69	59.79	72.5	17.52	20.8	1	1	0	1	0	0	1	1	1	1	1	1	1	1	1	0	0	0	1	1	1	1	1	0	1	1	1	1	1	1	1	0	1	1	1	1	1	1	1	1	0	1	1	1
Pachyramphus marginatus	11.48	52.87	65.25	18.97	18.4	1	0	0	0	0	0	0	0	1	0	0	1	0	0	0	0	0	0	0	0	0	0	0	0	0	1	0	0	0	0	0	0	0	0	0	0	0	0	0	0	0	0	0	0
Lipaugus lanioides	17.1	110.98	133.75	17.03	94.8	1	0	0	0	0	0	0	0	1	0	0	0	0	0	0	0	0	0	0	0	0	0	0	0	0	0	0	1	0	0	0	0	0	0	0	0	0	0	0	0	0	0	0	0
Procnias nudicollis	22.15	111.63	146.75	24.01	172.04	1	0	0	0	0	0	0	0	1	1	1	1	1	0	0	0	0	0	0	1	0	0	0	0	1	1	0	1	0	1	0	0	1	0	0	1	1	1	0	0	0	0	0	0
Pyroderus scutatus	31.62	171.73	210.5	18.49	357	1	0	0	0	0	0	0	0	1	0	1	1	1	1	0	0	0	0	0	0	1	0	0	0	0	0	0	1	0	1	0	0	1	0	0	0	0	0	0	0	0	0	0	0
Carpornis cucullata	12.75	90.88	113.25	19.79	74.19	1	0	0	0	0	0	0	0	1	0	1	1	0	0	0	0	0	0	0	0	0	0	0	0	1	0	0	1	0	0	1	0	0	0	0	0	0	0	0	0	0	0	0	0
Carpornis melanocephala	14.53	86.45	109.5	21.07	64.19	1	0	0	0	0	0	0	0	1	0	0	0	0	0	0	0	0	0	0	0	0	0	0	0	0	0	0	1	0	0	0	0	0	0	0	0	0	0	0	0	0	0	0	0
Phibalura flavirostris	13.33	66.15	99	33.16	46.5	1	0	0	0	0	0	0	1	0	0	1	0	0	0	0	0	0	0	0	0	0	0	0	0	0	0	0	0	0	1	0	0	0	0	0	0	0	0	0	0	0	0	0	0
Piprites chloris	10.89	50.87	66	22.92	16	1	0	1	1	1	1	1	0	1	0	1	0	0	0	0	0	0	0	0	0	1	0	0	0	0	0	0	1	0	1	0	0	0	0	0	0	0	0	0	0	0	0	0	0
Mionectes oleagineus	7.63	51.02	58.9	13.31	11.17	0	0	0	0	0	0	0	0	0	0	0	0	0	0	0	0	0	0	0	0	0	0	0	0	0	1	0	0	0	0	0	0	0	0	0	0	0	0	0	0	0	0	0	0
Mionectes rufiventris	6.9	60.05	69.25	13.27	13.3	1	1	1	1	1	0	0	0	1	0	1	1	1	1	1	0	0	0	0	1	1	1	0	1	1	0	0	1	0	1	1	0	1	1	1	1	1	0	0	0	0	0	0	0
Leptopogon amaurocephalus	8.41	50.61	61.9	18.27	11.7	1	1	1	1	1	1	1	1	1	1	1	1	1	1	1	1	0	0	1	1	1	1	1	1	0	1	1	1	1	1	1	1	1	1	1	1	0	0	0	1	1	1	1	1
Tolmomyias sulphurescens	11.1	52	59.5	12.54	14.3	1	1	1	1	1	1	1	1	1	1	1	1	1	1	1	0	1	1	1	1	1	1	1	1	1	1	1	1	1	1	1	0	1	1	1	1	1	0	0	1	1	1	1	1
Tolmomyias flaviventris	10.04	47.86	54.25	11.76	12.2	0	0	0	0	0	0	0	0	0	0	0	0	0	0	0	0	0	0	0	0	0	0	0	0	0	1	0	0	0	0	0	0	0	0	0	0	0	0	0	0	0	0	0	0
Todirostrum cinereum	6.35	36.94	41.25	10.44	6.29	0	1	0	1	0	1	1	1	0	1	0	0	0	0	0	1	1	1	1	0	0	0	0	0	0	1	1	0	1	0	0	0	0	1	1	0	0	0	0	1	1	1	1	1
Tyranniscus burmeisteri	7.7	48.58	64.5	24.63	11.1	1	0	0	0	0	0	0	0	1	0	1	1	1	0	0	0	0	1	0	0	0	0	0	0	1	0	0	0	0	1	0	0	0	0	0	1	0	1	0	0	0	0	0	0
Elaenia spectabilis	9.64	68.17	82.29	17.04	27.3	0	0	0	0	0	0	0	0	0	0	0	0	0	0	0	1	1	0	0	0	0	0	0	0	0	0	1	0	0	1	0	0	0	0	0	0	0	0	0	0	0	0	1	0
Elaenia parvirostris	8.66	57.85	71	18.49	13.8	0	0	0	0	0	0	0	0	1	0	0	0	0	1	0	1	0	0	0	1	0	1	0	0	1	0	1	0	0	0	1	0	0	1	1	0	0	1	1	0	0	0	0	0
Elaenia mesoleuca	8.85	62.98	80.75	21.99	17.6	1	0	1	0	0	0	0	1	0	0	1	1	0	1	0	0	0	0	0	1	0	0	0	0	1	0	0	1	0	1	1	0	1	0	0	1	1	1	1	0	0	1	0	1
Myiopagis caniceps	6.71	48.68	57.25	14.86	10.5	1	0	1	1	1	1	1	1	1	1	0	0	0	1	0	0	0	0	1	0	1	0	1	1	0	0	0	1	1	1	0	0	1	0	0	1	0	0	0	1	0	1	0	0
Myiopagis viridicata	7.21	48.05	56	14.2	11.51	0	1	1	0	0	0	0	1	0	1	0	0	0	1	0	0	0	0	0	0	0	0	0	1	0	0	1	0	1	1	1	0	0	0	0	0	0	0	0	1	1	0	1	1
Capsiempis flaveola	6.91	40.79	46.75	12.74	7.7	1	0	1	1	1	1	1	1	0	1	0	0	0	1	0	0	0	0	1	0	1	0	0	0	0	1	1	0	1	1	0	0	0	1	1	0	0	0	0	1	0	0	0	1
Phyllomyias virescens	6.77	52.13	64.75	19.57	8.2	1	0	0	0	0	0	0	0	1	0	1	0	0	0	0	0	0	0	0	0	0	1	0	0	1	0	0	1	0	1	0	0	0	0	0	0	0	0	0	0	0	0	0	0
Phyllomyias fasciatus	6.88	47.35	57.25	17.33	10.3	1	0	0	0	0	0	0	0	1	0	1	1	0	1	1	0	0	0	0	0	1	0	0	1	1	1	0	1	0	1	0	0	1	0	0	1	1	1	1	0	0	0	0	0
Phyllomyias griseocapilla	6.79	48.48	56.5	14.2	8	1	0	0	0	0	0	0	0	1	0	1	0	0	0	0	0	0	0	0	0	1	0	0	0	0	0	0	1	0	0	0	0	0	0	0	0	0	0	0	0	0	0	0	0
Attila phoenicurus	12.41	73.2	92.25	20.63	32.3	1	0	0	0	0	0	0	0	1	0	1	1	1	0	0	0	0	0	0	0	0	1	1	0	1	0	0	1	0	0	0	0	0	0	0	0	0	0	0	0	0	0	0	0
Attila rufus	14.55	79.63	92	13.46	42.6	1	0	0	0	0	0	0	0	1	1	1	1	1	0	1	0	0	0	0	0	1	0	0	0	0	1	0	1	0	0	0	1	0	1	1	0	0	0	0	0	0	0	0	0
Legatus leucophaius	9.4	59.03	76.75	22.96	22.2	1	0	0	0	0	0	0	1	1	1	1	1	1	1	0	0	0	0	1	0	0	0	0	1	0	1	0	1	0	1	1	0	0	0	0	0	0	0	0	0	0	0	0	0
Myiarchus tuberculifer	10.34	67.94	79.6	14.5	17.7	0	0	0	0	0	0	0	0	0	0	0	0	0	0	1	0	0	0	0	0	0	0	0	0	0	0	0	0	0	0	0	0	0	0	0	0	0	0	0	0	0	0	0	0
Myiarchus swainsoni	12.45	71.53	86.25	16.99	25.1	1	1	0	0	0	1	1	1	1	1	1	1	1	1	1	0	0	1	1	1	1	1	1	1	1	0	0	1	1	1	1	0	1	0	0	1	1	1	1	1	1	1	1	1
Myiarchus ferox	11.02	76.31	84.5	9.68	27.5	1	1	0	0	0	0	0	1	0	1	1	1	1	1	1	1	1	0	1	1	0	0	0	1	0	1	1	1	0	1	0	0	0	1	1	0	0	0	0	1	1	1	1	1
Sirystes sibilator	12.9	73.03	91	19.68	32.3	1	1	1	1	1	0	1	1	1	1	1	1	1	0	1	0	0	0	1	0	1	0	0	1	0	0	0	1	1	1	0	0	0	0	0	0	0	0	0	0	0	0	0	0
Rhytipterna simplex	13.76	82.78	95.5	13.33	31.8	1	0	0	0	0	0	0	0	0	0	0	0	0	0	0	0	0	0	0	0	0	0	0	0	0	1	0	0	0	0	0	0	0	0	0	0	0	0	0	0	0	0	0	0
Myiodynastes maculatus	15.9	86.15	101.75	15.25	43.2	1	1	1	1	1	1	1	1	1	1	1	1	1	1	1	1	1	1	1	1	1	1	1	1	1	1	1	1	1	1	1	1	1	0	0	1	1	1	1	1	1	1	1	1
Megarynchus pitangua	17.34	96.98	113	14.18	69.91	1	1	1	1	1	1	1	1	1	1	1	1	1	1	1	0	0	1	1	1	1	1	1	1	1	1	1	1	1	1	1	1	1	0	0	1	0	0	0	1	1	1	1	1
Myiozetetes similis	11	75.28	85.75	12.15	28	1	1	1	1	1	1	0	1	1	1	1	1	1	1	1	1	1	0	1	1	0	0	0	1	0	1	1	1	1	1	0	0	0	1	0	0	0	0	0	1	1	1	1	1
Empidonomus varius	10.01	73.59	91	19.1	27.1	1	1	0	1	1	0	0	1	1	1	1	1	0	0	1	0	0	1	1	1	1	1	0	0	1	0	1	1	1	1	1	1	0	1	1	0	1	1	1	1	1	0	1	1
Empidonax alnorum	8.3	51.75	65	20.32	12.7	0	0	0	0	0	0	0	0	0	0	0	0	0	0	0	0	0	0	0	0	0	0	0	0	0	0	0	0	0	1	0	0	0	0	0	0	0	0	0	0	0	0	0	0
Vireo chivi	7.8	55.37	73.25	23.98	13.25	1	1	0	0	0	0	1	1	1	1	1	1	1	1	1	1	1	1	1	1	1	1	1	1	1	1	1	1	0	1	1	0	1	1	1	1	1	1	1	1	1	1	1	1
Hylophilus poicilotis	6.23	48.75	55.25	11.77	10.4	1	1	0	1	0	0	1	0	1	1	1	1	1	0	1	0	0	0	0	0	0	1	0	0	1	0	0	1	0	1	1	0	1	1	0	1	1	1	0	0	0	0	0	0
Cyanocorax cyanomelas	19	154.98	184.25	15.86	207	0	0	0	0	0	0	0	0	0	0	0	0	0	0	0	0	0	0	0	0	0	0	0	0	0	0	0	0	0	1	0	0	0	0	0	0	0	0	0	0	0	0	0	0
Cyanocorax caeruleus	18.65	165.08	193.25	14.47	272	1	0	0	0	0	0	0	0	1	0	0	0	0	0	0	0	0	0	0	0	0	1	0	0	1	0	0	1	0	0	1	0	1	0	0	1	1	1	1	0	0	0	0	0
Cyanocorax chrysops	17.21	133.3	149.75	10.91	166	0	0	1	1	1	1	0	1	0	1	0	0	0	0	0	0	0	0	0	0	0	1	0	0	1	0	0	0	1	1	0	1	1	0	0	0	0	1	0	0	0	0	0	0
Turdus flavipes	10.48	78.5	108.5	27.64	65.14	1	1	0	0	0	0	0	1	1	0	1	1	1	1	0	0	0	0	0	0	0	1	0	0	1	1	0	1	0	0	0	0	0	1	1	0	1	0	0	0	0	0	0	0
Turdus leucomelas	11.78	91.33	111	17.7	69.1	1	1	1	1	1	1	1	1	0	1	1	0	1	1	1	1	1	1	1	1	1	1	1	1	0	1	1	1	1	1	1	1	0	0	0	0	0	0	0	1	1	1	1	1
Turdus rufiventris	12.3	93.45	111.75	16.4	69.44	1	1	1	1	1	1	1	0	1	1	1	1	1	1	1	1	1	1	1	1	1	1	1	1	1	0	1	1	1	1	1	1	1	1	1	1	1	1	1	1	0	1	1	0
Turdus amaurochalinus	13.08	86.19	114.7	24.85	57.9	1	1	1	1	1	1	1	1	1	1	1	1	1	1	1	0	1	1	1	0	0	1	1	1	1	1	1	1	1	1	1	1	1	1	1	1	1	1	1	1	1	1	1	1
Turdus subalaris	10.93	87.6	113	22.48	49.5	1	1	0	1	1	1	0	1	1	1	0	0	1	1	0	0	0	0	0	0	0	1	1	1	1	1	0	0	1	1	1	1	0	0	0	0	0	1	1	0	0	1	1	0
Turdus albicollis	12.6	81.25	102.67	20.79	54	1	1	1	1	1	0	1	1	1	1	1	1	1	1	1	0	0	0	1	1	1	1	1	0	1	1	0	1	0	1	1	0	1	1	1	1	1	1	1	0	0	0	0	0
Arremon taciturnus	8.89	64.72	72.3	10.39	24.8	1	0	0	0	0	0	0	0	0	0	0	0	0	0	0	0	0	0	0	0	0	0	0	0	0	0	0	0	0	0	0	0	0	0	0	0	0	0	0	0	0	0	0	0
Arremon semitorquatus	8.81	65.74	70	6.13	28.08	0	0	0	0	0	0	0	0	1	0	0	0	0	0	1	0	0	0	0	0	1	0	0	0	0	0	0	1	0	0	0	0	0	0	0	0	0	0	0	0	0	0	0	0
Arremon flavirostris	8.9	65.88	70.75	6.84	26.13	0	0	0	0	1	1	1	0	0	1	0	0	0	1	0	1	1	0	1	0	0	0	0	1	0	0	1	0	0	1	0	0	0	1	0	0	0	0	0	1	1	1	1	1
Setophaga pitiayumi	5.48	39.92	51	21.7	6.82	1	1	1	1	1	1	1	1	1	1	1	1	1	0	1	0	0	1	1	1	1	1	1	0	1	1	1	1	1	1	1	1	1	1	1	1	1	1	1	1	0	0	1	1
Basileuterus culicivorus	6.48	47.95	60	20.12	10.5	1	1	1	1	1	1	1	1	1	1	1	1	1	1	1	1	1	1	1	1	1	1	1	1	1	0	1	1	1	1	1	1	1	1	1	1	1	1	1	1	1	1	1	1
Psarocolius decumanus	16.21	145.06	174.25	16.67	206.3	0	0	0	0	0	0	0	0	0	0	0	0	0	1	1	0	0	0	0	1	0	0	0	1	0	0	0	0	0	0	0	0	0	0	0	0	0	0	0	0	0	0	0	0
Cacicus chrysopterus	7.9	82	99.75	17.78	36.16	1	0	1	0	0	0	0	0	1	0	1	1	1	0	0	0	0	0	0	0	0	1	1	0	1	0	0	1	0	1	1	1	1	0	0	1	1	1	1	0	0	0	0	0
Cacicus haemorrhous	11.66	120.27	159.5	24.08	83.71	1	0	1	1	1	1	1	0	1	0	0	0	0	0	0	0	1	0	1	0	0	1	1	0	0	1	0	1	1	1	0	0	0	0	0	1	1	0	0	0	0	0	0	0
Orthogonys chloricterus	11.13	69.1	90.75	23.84	40	1	0	0	0	0	0	0	0	1	0	1	1	0	0	0	0	0	0	0	0	0	0	0	0	0	0	0	1	0	0	0	0	0	0	0	0	0	0	0	0	0	0	0	0
Saltator maximus	12.28	78.34	93.8	16.41	47.62	0	0	0	0	0	0	0	0	0	0	0	0	0	0	0	0	0	0	0	0	0	0	0	0	0	1	0	0	0	0	0	0	0	0	0	0	0	0	0	0	0	0	0	0
Saltator similis	11.7	84.68	99.25	14.77	43.3	1	1	1	1	1	1	1	1	1	1	1	1	1	1	1	1	1	1	0	1	1	1	1	1	1	0	1	1	1	1	1	1	1	1	1	1	1	1	1	0	0	1	0	1
Saltator maxillosus	13.36	84.55	98	13.68	50.8	1	0	0	0	0	0	0	0	0	0	0	0	0	0	0	0	0	0	0	0	0	1	0	0	1	0	0	1	0	0	0	0	0	0	0	0	0	0	0	0	0	0	0	0
Saltator grossus	12.14	84.39	95	11.16	44.2	0	0	0	0	0	0	0	0	0	0	0	0	0	0	0	0	0	0	0	0	0	0	0	0	0	0	0	0	0	1	0	0	0	0	0	0	0	0	0	0	0	0	0	0
Saltator fuliginosus	15.38	90.03	104.75	14.03	50.5	1	0	1	1	1	1	0	1	1	1	1	0	1	0	0	1	1	1	0	1	0	0	1	0	0	0	0	1	0	0	0	0	0	0	0	1	0	0	0	0	0	0	0	0
Tachyphonus coronatus	9.01	68.2	82.25	17.07	29.3	1	1	1	1	1	1	0	1	1	1	1	1	1	1	1	1	1	0	1	1	1	1	1	1	1	1	1	1	1	1	1	1	1	1	1	1	1	0	0	1	0	1	1	1
Ramphocelus bresilius	11.9	70.7	82	13.75	32.9	1	0	0	0	0	0	0	0	1	0	0	0	1	0	0	0	0	0	0	0	0	0	0	0	0	1	0	1	0	0	0	0	0	0	0	0	0	0	0	0	0	0	0	0
Lanio cristatus	8.88	59.58	73.75	19.21	18.8	1	0	0	0	0	0	0	0	1	0	1	1	0	0	0	0	0	0	0	0	0	0	0	0	0	1	0	1	0	0	0	0	0	0	0	0	0	0	0	0	0	0	0	0
Lanio penicillatus	11.18	72.16	88.17	18.06	27	0	0	0	0	0	0	0	0	0	0	0	0	0	0	0	1	1	0	0	0	0	0	0	0	0	0	0	0	0	0	0	0	0	0	0	0	0	0	0	0	0	1	1	0
Lanio melanops	9.9	63.82	80	20.21	22.58	1	1	1	1	1	1	1	1	1	1	1	1	1	1	1	1	1	1	1	1	1	0	1	1	0	1	0	1	1	1	1	1	1	1	1	1	1	0	0	0	0	0	0	0
Tangara brasiliensis	8.36	54.84	68.75	20.32	20.5	0	0	0	0	0	0	0	0	0	0	0	0	0	0	0	0	0	0	0	0	0	0	0	0	0	1	0	0	0	0	0	0	0	0	0	0	0	0	0	0	0	0	0	0
Tangara seledon	7	49.88	64.25	22.37	18.7	1	0	0	0	0	0	0	0	1	0	1	1	1	0	0	0	0	0	0	0	0	0	0	0	0	0	0	1	0	1	0	0	0	0	0	0	0	0	0	0	0	0	0	0
Tangara cyanocephala	6.68	50.38	64	21.29	18	1	0	0	0	0	0	0	0	1	0	1	0	1	0	0	0	0	0	0	0	0	0	0	0	0	0	0	1	0	0	0	0	0	0	0	0	0	0	0	0	0	0	0	0
Tangara cyanoventris	6.85	54.03	66.75	19.07	16.5	1	0	0	0	0	0	0	0	0	0	0	0	0	1	1	0	0	0	0	0	1	0	0	1	0	0	0	0	0	0	0	0	0	0	0	0	0	0	0	0	0	0	0	0
Tangara desmaresti	7.33	56.8	71	20.06	20.4	1	0	0	0	0	0	0	0	1	0	1	1	1	0	0	0	0	0	0	0	0	1	0	0	0	0	0	1	0	0	0	0	0	1	1	0	0	0	0	0	0	0	0	0
Tangara cyanoptera	10	72.13	96.13	24.96	43.3	1	0	0	0	0	0	0	0	1	0	1	1	1	0	0	0	0	0	0	0	0	0	0	0	0	0	0	1	0	0	0	0	0	0	0	0	0	0	0	0	0	0	0	0
Tangara palmarum	10.41	73.25	90	18.62	39	1	0	0	0	0	0	0	0	1	0	1	1	0	1	1	1	0	1	0	0	0	0	0	0	0	1	1	1	0	0	0	0	0	0	0	0	0	0	0	0	0	0	0	0
Tangara ornata	9.95	70.65	95.75	26.21	33	1	0	0	0	0	0	0	0	1	0	1	1	1	1	1	0	0	0	0	0	1	0	0	1	0	0	0	1	0	0	0	0	0	0	0	0	0	0	0	0	0	0	0	0
Tangara peruviana	7.45	56.5	72	21.54	22.2	1	0	0	0	0	0	0	0	0	0	0	0	0	0	0	0	0	0	0	0	0	0	0	0	0	1	0	1	0	0	0	0	1	0	0	0	0	0	0	0	0	0	0	0
Tangara preciosa	7.4	61.15	77.5	21.06	22.8	1	0	0	0	0	0	0	0	0	0	0	1	0	0	0	0	0	0	0	0	0	1	0	0	1	0	0	1	0	0	1	0	0	0	0	1	1	1	0	0	0	0	0	0
Cissopis leverianus	12.55	90.76	102.75	11.63	76	1	0	1	1	1	1	1	0	1	1	1	0	0	0	0	0	0	0	0	0	0	1	0	0	0	0	0	0	1	1	0	1	0	0	0	0	0	0	0	0	0	0	0	0
Pipraeidea melanonota	8.4	58.55	77.5	24.47	21	1	0	1	0	0	0	0	1	1	1	1	1	1	0	0	0	0	0	1	1	1	1	0	1	1	1	0	1	0	1	1	0	0	0	0	1	1	1	1	0	0	0	0	0
Tersina viridis	14.33	65.95	83	20.5	29	1	1	0	0	0	0	0	1	1	1	1	1	1	1	1	0	1	0	1	1	1	0	0	1	1	0	0	0	0	1	0	1	1	0	0	1	1	1	1	0	1	1	1	0
Dacnis nigripes	6.08	42.28	59.5	28.96	14	1	0	0	0	0	0	0	0	0	0	1	0	0	0	0	0	0	0	0	0	0	0	0	0	1	0	0	1	0	0	0	0	0	0	0	0	0	0	0	0	0	0	0	0
Dacnis cayana	7.92	49.5	62	20.09	13	1	1	0	0	0	0	0	1	1	1	1	1	1	1	1	1	1	1	1	1	0	0	0	1	0	1	1	1	1	1	0	0	0	0	0	0	0	0	0	0	0	0	0	0
Cyanerpes cyaneus	7.35	45.37	62.25	27.1	14	0	0	0	0	0	0	0	0	0	0	0	0	0	0	0	0	0	0	0	0	0	0	0	0	0	1	0	0	0	0	0	0	0	0	0	0	0	0	0	0	0	0	0	0
Chlorophanes spiza	8.14	52.11	66.5	21.5	19	1	0	0	0	0	0	0	0	1	0	0	0	0	0	0	0	0	0	0	0	0	0	0	0	0	0	0	1	0	0	0	0	0	0	0	0	0	0	0	0	0	0	0	0
Hemithraupis guira	7.21	49	61.75	20.61	12	0	0	1	1	1	1	1	0	0	1	0	0	0	0	0	1	0	1	1	0	0	1	1	0	1	0	0	1	1	1	1	0	1	0	0	0	0	0	0	1	0	0	1	0
Hemithraupis ruficapilla	6.1	50.8	63.75	20.31	11	1	0	0	0	0	0	0	1	1	1	1	1	1	1	1	1	1	0	0	0	1	0	0	1	0	1	0	1	0	0	0	0	0	1	1	1	0	0	0	0	0	0	0	0
Hemithraupis flavicollis	7.02	51.43	65	20.93	12.8	0	0	0	0	0	0	0	0	0	0	0	0	0	0	0	0	0	0	0	0	0	0	0	0	0	1	0	0	0	0	0	0	0	0	0	0	0	0	0	0	0	0	0	0
Conirostrum speciosum	6	44.95	58.5	23.11	8.8	1	1	1	1	1	1	1	1	0	1	1	1	0	1	1	1	1	1	1	0	1	1	1	0	0	1	1	1	1	1	0	1	1	1	1	0	0	0	0	0	0	0	1	0
Poospiza thoracica	6.67	52.3	63.75	17.97	11.9	0	0	0	0	0	0	0	0	0	0	0	0	0	0	0	0	0	0	0	0	0	1	0	0	0	0	0	0	0	0	0	0	0	0	0	0	0	0	0	0	0	0	0	0
Habia rubica	11.49	70.9	87.1	18.64	32.46	1	1	1	1	1	1	1	1	1	1	1	1	1	0	1	1	1	1	1	1	1	0	0	0	1	0	1	1	1	1	1	0	0	0	0	1	1	0	0	1	0	1	0	1
Euphonia chlorotica	6	44.43	56.25	20.92	11	1	1	1	1	1	0	1	1	1	1	0	0	1	1	1	1	1	1	1	1	1	0	1	1	1	1	1	0	1	1	1	1	0	1	0	0	0	0	0	1	1	1	1	1
Euphonia violacea	8.26	42.58	54.25	21.54	15	1	0	1	1	1	1	0	1	1	1	0	1	1	0	0	0	0	0	1	1	0	0	1	0	0	1	1	1	1	1	0	0	1	0	0	0	0	0	0	1	0	1	0	1
Euphonia chalybea	8.15	50.73	68.25	25.66	19	1	0	0	0	0	0	0	0	1	0	1	0	0	0	0	0	0	0	0	0	0	0	0	0	1	0	0	1	0	1	1	0	0	0	0	1	1	0	0	0	0	0	0	0
Euphonia cyanocephala	6.55	44.4	64.25	30.9	14	1	0	1	0	0	0	0	0	0	0	0	0	0	0	0	0	0	0	0	0	0	0	0	0	0	0	0	1	0	1	1	0	1	0	0	1	0	1	0	0	0	0	0	0
Euphonia pectoralis	7.08	48.85	62.5	21.81	14.4	1	0	0	0	0	0	0	0	1	0	1	1	1	0	0	0	0	0	0	0	1	0	0	0	1	0	0	1	0	1	1	0	0	0	0	1	1	0	0	0	0	0	0	0
Chlorophonia cyanea	6.65	47.18	63.25	25.35	14	1	0	1	0	0	0	0	0	1	0	1	0	0	0	0	0	0	0	0	0	0	0	1	0	1	0	0	1	0	1	0	0	0	0	0	0	0	0	0	0	0	0	0	0
References
1. Aleixo, A., Galetti, M., 1997. The conservation of the avifauna in a lowland Atlantic forest in south-east Brazil. Bird Conservation International, 7(03), 235-261.
2. Aleixo, A., Vielliard, J.M., 1995. Composição e dinâmica da avifauna da mata de Santa Genebra, Campinas, São Paulo, Brasil. Revista Brasileira de Zoologia, 12(3), 493-511.
3. Anjos, L., 2001. Bird communities in five Atlantic forest fragments in southern Brazil. Ornitologia Neotropical, 12, 11-27.
4. Antunes, A.Z., 2005. Alterações na composição da comunidade de aves ao longo do tempo em um fragmento florestal no sudeste do Brasil. Ararajuba, 13(1), 47-61.
5. Antunes, A.Z., Silva, B.G.D., Matsukuma, C.K., Eston, M.R.D., Santos, A.M.R.D., 2013. Aves do Parque Estadual Carlos Botelho–SP. Biota Neotropica, 13(2), 124-140.
6. Cavarzere, V., Moraes, G.P., Donatelli, R.J., 2009. Avifauna da Estação Ecológica dos Caetetus, interior de São Paulo, Brasil. Papéis Avulsos de Zoologia (São Paulo), 49(35), 477-485.
7. Cavarzere, V., Moraes, G.P., Silveira, L.F., 2010. Boracéia Biological Station: an ornithological review. Papéis Avulsos de Zoologia (São Paulo), 50(13), 189-201.
8. Develey, P.F., Martensen, A.C., 2006. Birds of Morro Grande Reserve (Cotia, SP). Biota Neotropica, 6(2), 0-0.
9. Donatelli, R.J., Ferreira, C.D., Costa, T.V.V., 2011. Avian communities in woodlots in Parque das Neblinas, Bertioga, São Paulo, Brazil. Revista Brasileira de Biociências, 9(2).
10. Faria, C.M., Rodrigues, M., Amaral, F.Q., Módena, É., Fernandes, A.M., 2006. Aves de um fragmento de Mata Atlântica no alto Rio Doce, Minas Gerais: colonização e extinção. Revista Brasileira de Zoologia, 23(4), 1217-1230.
11. Manhães, M.A., Loures-Ribeiro, A., 2011. Avifauna da Reserva Biológica Municipal Poço D’Anta, Juiz de Fora, MG. Biota Neotropica, 11(3), 275-286.
12. Pozza, D.D., Pires, J.S.R., 2003. Bird communities in two fragments of semideciduos forest in rural São Paulo state. Brazilian Journal of Biology, 63(2), 307-319.
13. Bornschein, M.R., Reinert, B.L., 2000. Aves de três remanescentes florestais do norte do estado do Paraná, sul do Brasil, com sugestões para a conservação e manejo. Revista Brasileira de Zoologia, 17(3), 615-636.
14. Oliveira, R.C., 2011. Relatório do Levantamento da avifauna do PE Mata São Francisco – PR. Londrina.
15. Cavarzere, V., Alves, F., Machado, É., Rego, M.A., Silveira, L.F., Costa, M.M., Calonge-Méndez, A., 2013. Evaluation of methodological protocols using point counts and mist nets: a case study in southeastern Brazil. Papéis Avulsos de Zoologia (São Paulo), 53(26), 345-357.
16. Corrêa, L., Bazílio, S., Woldan, D., Boesing, A.L., 2008. Avifauna da Floresta Nacional de Três Barras (Santa Catarina, Brasil). Atualidades Ornitológicas, 143, 38-41.
17. Favretto, M.A., Zago, T., Guzzi, A., 2008. Avifauna do Parque Natural Municipal Rio do Peixe, Santa Catarina, Brasil. Atualidades Ornitológicas, 141, 87-93.
18. Ferreira, J.D., Costa, L.M., Rodrigues, M., 2009. Aves de um remanescente florestal do Quadrilátero Ferrífero, Minas Gerais. Biota Neotropica, 9(3), 39-54.
19. Franz, I., Barros, M.P.D., Cappelatti, L., Dala-Corte, R.B., Ott, P.H., 2014. Birds of two protected areas in the southern range of the Brazilian Araucaria forest. Papéis Avulsos de Zoologia (São Paulo), 54(10), 111-127.
20. Pacheco, J.F., Nascimento, I., 2010. Avifauna da Reserva Biológica de Poço das Antas, Silva Jardim, RJ. Biológica, 9(771981), 887003.
21. Athiê, S., 2009. Composição da avifauna e frugivoria por aves em um mosaico de vegetação secundária em Rio Claro, SP. Dissertação do programa Mestre em Ecologia e Recursos Naturais. UFSCar.
22. Straube, F.C., Urben-Filho, A., 2005a. Avifauna da Reserva Natural Salto Morato (Guaraqueçaba, Paraná). Atualidades Ornitológicas, 124, 12.
23. Straube, F.C., Urben-Filho, A., 2005b. Observações sobre a avifauna de pequenos remanescentes florestais na região noroeste do Paraná (Brasil). Atualidades Ornitológicas, 123, 10.
24. Straube, F.C., Urben-Filho, A., 2004. Uma revisão crítica sobre o grau de conhecimento da avifauna do Parque Nacional do Iguaçu (Paraná, Brasil) e áreas adjacentes. Atualidades Ornitológicas, 118, 6.
25. Straube, F.C., Urben-Filho, A., Cândido Jr, J.F., 2004. Novas informações sobre a avifauna do Parque Nacional do Iguaçu (Paraná). Atualidades Ornitológicas, 120, 10.
26. Oliveira, S.L., Köhler, A., 2010. Avifauna da RPPN da UNISC, Sinimbu, Rio Grande do Sul, Brasil. Biotemas, 23(3), 93-103.
27. Vogel, H.F., Zawadzki, C.H., Metri, R., Valle, L.G., Filho, A.B.S., 2010. Avifauna da RPPN Ninho do Corvo, um fragmento de floresta ombrófila mista na região centro sul do estado do Paraná, Brasil.
28. Volpato, G.H., Prado, V.M., Anjos, L., 2010. What can tree plantations do for forest birds in fragmented forest landscapes? A case study in southern Brazil. Forest Ecology and Management, 260(7), 1156-1163.
29. Dário, F.R., 1999. Influência de corredor florestal entre fragmentos da Mata Atlântica utilizando-se a avifauna como indicador ecológico.
30. Anjos, L., Boçon, R., 1999. Bird communities in natural forest patches in southern Brazil. The Wilson Bulletin, 397-414.
31. Alexandrino, E.R., Buechley, E.R., Piratelli, A.J., Ferraz, K.M.P.M.B., Moral, R.A., Sekercioglu, C.H., Silva, W.R., Couto, H.T.Z., 2016. Bird sensitivity to disturbance as an indicator of forest patch conditions: An issue in environmental assessments. Ecological Indicators, 66, 369-381.
32. Luz. D.T.A., 2013. Ecologia trófica em matrizes agrícolas: uso da ferramenta isotópica para conservação de aves em ambientes antrópicos. Dissertação (Mestrado em Recursos Florestais) – Escola Superior de Agricultura “Luiz de Queiroz”, Universidade de São Paulo, Piracicaba.
33. Luz, D.T.A., 2010. Interações frugívoros-plantas: diagnóstico em um fragmento degradado. Piracicaba.
[truncated: 4 more columns]

## Sheet: Table S2
Table S2 - Traits range, description and ecological meaning.
Traits	Range	Description	Ecological meaning	Reference
Gape width	5.40 - 31.62	The width of the open mouth (mm)	It is the limit to fruit size that can be swallowed by a bird (Whellwright, 1985), representing a clear threshold to plant species that can or not be dispersed by birds according to their gapes. Other studies have used this measure to similiar approaches (Galetti et al., 2013; Pigot et al., 2016).	Museum
First-secondary length (FSL)	36.94 - 355.48	The length from the carpal joint to the tip of the first secondary feather (mm) - as defined in Claramunt et al., 2011	(used to calculate Hand-wing index)	Museum
Wing length (WL)	41.25 - 410.5	The distance from the carpal joint to the tip of the longest primary feather (mm) - as defined in Claramunt et al., 2011	(used to calculate Hand-wing index)	Museum
Hand-wing index	0 - 50.96	100 x (WL – SL) / WL	Can be used as a surrogate to flight and dispersal ability of the bird species (Dawideit et al., 2009). Species with highest values trend to have ability to move further than the smallest values species. Flight ability can act as a important agent to the seed flow beetwen areas, once species skillfull species can disperse seed fruits further.	-
Body mass	6.29 - 3500	Average body mass of 4 individuals (when possible), two males and two females (g)	Large species need more resources, eating more fruits and dispersing more seeds (Jordano and Schupp., 2000; Allenspach and Dias, 2012). Also, the probability to deposit seeds at greater distances from the parent plant is higher to seed swalled for large-bodied frugivorous (Wotton and Kelly, 2012).	Dunning et al., 2007
References
Allenspach, N., Dias, M.M., 2012. Frugivory by birds on Miconia albicans (Melastomataceae), in a fragment of cerrado in São Carlos, southeastern Brazil. Brazilian Journal of Biology, 72(2), 407-413
Dawideit, B.A., Phillimore, A.B., Laube, I., Leisler, B., Böhning‐Gaese, K., 2009. Ecomorphological predictors of natal dispersal distances in birds.Journal of Animal Ecology, 78(2), 388-395
Dunning Jr, J.B., 2007. CRC handbook of avian body masses. CRC press.
Galetti, M., Guevara, R., Côrtes, M. C., Fadini, R., Von Matter, S., Leite, A.B., Labecca, F., Ribeiro, T., Carvalho, C.S., Collevatti, R.G., Pires, M.M., Guimarães Jr., P.R., Brancalion, P.H., Ribeiro, M.C., Pires, M.M., 2013. Functional extinction of birds drives rapid evolutionary changes in seed size. Science, 340(6136), 1086-1090.
Wheelwright, N.T., 1985. Fruit‐size, gape width, and the diets of fruit‐eating birds. Ecology, 66(3), 808-818
Pigot, A.L., Bregman, T., Sheard, C., Daly, B., Etienne, R.S., Tobias, J.A., 2016. Quantifying species contributions to ecosystem processes: a global assessment of functional trait and phylogenetic metrics across avian seed-dispersal networks. Proc. R. Soc. B., 283(1844), 20161597
Claramunt, S., Derryberry, E.P., Remsen, J.V., Brumfield, R.T., 2012. High dispersal ability inhibits speciation in a continental radiation of passerine birds. Proceedings of the Royal Society of London B: Biological Sciences,279(1733), 1567-1574
Jordano, P., Schupp, E.W., 2000. Seed disperser effectiveness: the quantity component and patterns of seed rain for Prunus mahaleb. Ecological monographs, 70(4), 591-615
Wotton, D.M., Kelly, D., 2012. Do larger frugivores move seeds further? Body size, seed dispersal distance, and a case study of a large, sedentary pigeon. Journal of Biogeography, 39(11), 1973-1983

## Sheet: Table S3
Table S3 - Intercept and slopes values of quantile regressions for three morphological trait (hand-wing index, body mass and gape width) of frugivorous bird species in the southeastern portion of the Brazilian Atlantic Forest.
Quantile	Body mass		Gape width		HWI
	Intercept	Slope	Intercept	Slope	Intercept	Slope
0.1	2.3339	0.0055	6.3821	0.0318	9.8359	0.1475
0.3	2.7749	0.0129	8.48	0	14.0814	0.1246
0.5	3.275	0.0152	9.833	0.0439	17.1381	0.1737
0.7	4.03	0.0111	11.7663	0.0749	19.9841	0.1528
0.9	5.0217	0.0143	15.7482	0.3093	23.8489	0.3437
0.95	5.2914	0.0453	18.365	0.3788	30.2068	0.4056
